# Supplementary material for: Plasma Cholesterol- and Body Fat-Lowering Effects of Chicken Protein Hydrolysate and Oil in High-Fat Fed Male Wistar Rats
Source: MDPI journal article supplement (doi:10.3390/nu14245364), 2022-12-16
Supplement: s1 [file nutrients-1931720-supplementary.pdf › nutrients-1931720-supplementary.pdf]

Supplementary Materials

# Plasma Cholesterol- and Body Fat-Lowering Effects of Chicken Protein Hydrolysate and Oil in High-Fat Fed Male Wistar Rats

Thomas A. Aloysius <sup>1</sup>, Veronika Tillander <sup>2</sup>, Matteo Pedrelli <sup>2,3</sup>, Simon N. Dankel <sup>1</sup>, Rolf K. Berge <sup>1,4,\*</sup> and Bodil Bjørndal <sup>1,5,\*</sup>

## Supplementary tables

**Table S1.** Plasma lipid levels and hepatic enzyme activities in Wistar rats fed high-fat diets with different protein sources for 12 weeks<sup>a</sup>.

|                                                | Casein      | Chicken     | Pork                     | CPH                       |
|------------------------------------------------|-------------|-------------|--------------------------|---------------------------|
| <b>Plasma lipids</b>                           |             |             |                          |                           |
| Cholesterol (mmol/L)                           | 2.44 ± 0.47 | 2.19 ± 0.25 | 2.18 ± 0.41              | 1.69 ± 0.29 <sup>*#</sup> |
| HDL cholesterol (mmol/L)                       | 1.91 ± 0.32 | 1.62 ± 0.22 | 1.70 ± 0.34              | 1.32 ± 0.22 <sup>*</sup>  |
| LDL cholesterol (mmol/L)                       | 0.49 ± 0.09 | 0.38 ± 0.10 | 0.27 ± 0.09 <sup>*</sup> | 0.23 ± 0.09 <sup>*#</sup> |
| Free cholesterol (mmol/L)                      | 0.60 ± 0.14 | 0.54 ± 0.08 | 0.54 ± 0.12              | 0.44 ± 0.10               |
| Triglycerides (mmol/L)                         | 1.02 ± 0.28 | 1.26 ± 0.42 | 1.39 ± 0.53              | 1.10 ± 0.32               |
| Phospholipids (mmol/L)                         | 2.01 ± 0.39 | 1.90 ± 0.26 | 1.90 ± 0.34              | 1.67 ± 0.27               |
| Free fatty acids (mmol/L)                      | 0.31 ± 0.08 | 0.28 ± 0.08 | 0.29 ± 0.12              | 0.34 ± 0.11               |
| <b>Liver enzyme activity</b>                   |             |             |                          |                           |
| β-oxidation (nmol/mg/min)                      | 0.42 ± 0.07 | 0.49 ± 0.09 | 0.43 ± 0.09              | 0.49 ± 0.08               |
| Inhibition of β-oxidation with malonyl-CoA (%) | 21.9 ± 7.30 | 25.5 ± 4.74 | 20.9 ± 5.64              | 22.8 ± 9.30               |
| CPT2 (nmol/mg/min)                             | 1.07 ± 0.17 | 1.26 ± 0.33 | 1.29 ± 0.38              | 1.39 ± 0.29               |
| HMG CoA synthase (nmol/mg/min)                 | 2.94 ± 0.88 | 3.19 ± 0.73 | 3.50 ± 0.91              | 3.09 ± 0.74               |
| ACOX (nmol/mg/min)                             | 14.0 ± 2.99 | 14.4 ± 2.50 | 13.6 ± 2.27              | 12.2 ± 1.38               |
| GPAT (nmol/mg/min)                             | 1.01 ± 0.13 | 1.08 ± 0.13 | 1.09 ± 0.17              | 0.89 ± 0.12               |
| FAS (nmol/mg/min)                              | 0.21 ± 0.09 | 0.25 ± 0.09 | 0.22 ± 0.07              | 0.10 ± 0.04 <sup>#</sup>  |
| ACC (nmol/mg/min)                              | 4.79 ± 2.26 | 4.30 ± 0.88 | 5.16 ± 1.43              | 2.72 ± 0.83               |
| HMG CoA reductase (pmol/mg/min)                | 12.7 ± 2.75 | 13.8 ± 2.81 | -                        | 11.5 ± 2.04               |

**Abbreviations:** ACC, acetyl-CoA carboxylase; ACOX, acyl-coenzyme A oxidase 1; CPT2, carnitine palmitoyltransferase II; FAS, fatty acid synthase; GPAT, glycerol-3-phosphate acyltransferase.

<sup>a</sup> Means ± standard deviations are shown (*n* = 8). Different superscript letters indicate significantly different values as determined by one-way ANOVA with Tukey's post hoc test, *p* < 0.05.
